# Supplementary material for: High triplet energy exciplex host derived from a CN modified carbazole based n-type host for improved efficiency and lifetime in blue phosphorescent organic light-emitting diodes
Source: Royal Society of Chemistry journal article supplement (doi:10.1039/c8tc02918k), 2018-01-01
Supplement: c8tc02918k1.pdf [file c8tc02918k1.pdf]

### Supporting information

#### **High triplet energy exciplex host for improved efficiency and lifetime in blue phosphorescent organic light-emitting diodes**

Su Kyeong Shin, Si Hyun Han, Jun Yeob Lee\*

School of Chemical Engineering, Sungkyunkwan University  
2066, Seobu-ro, Jangan-gu, Suwon, Gyeonggi, 440-746, Korea  
E-mail: [leej17@skku.edu](mailto:leej17@skku.edu)

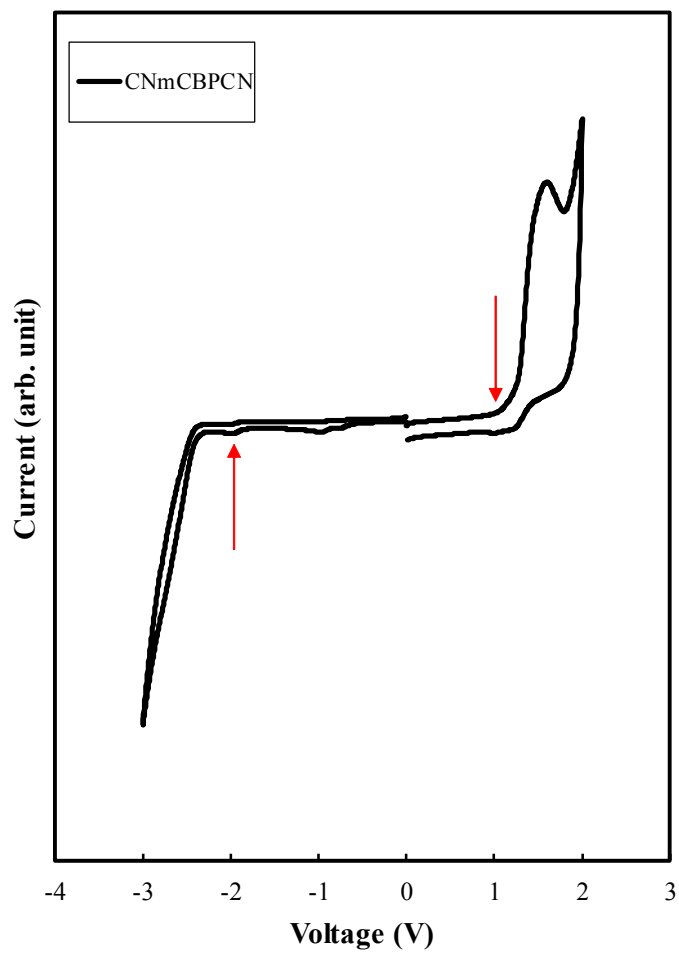

**Figure S1.** CV curves for the oxidation and reduction of CNmCBPCN.

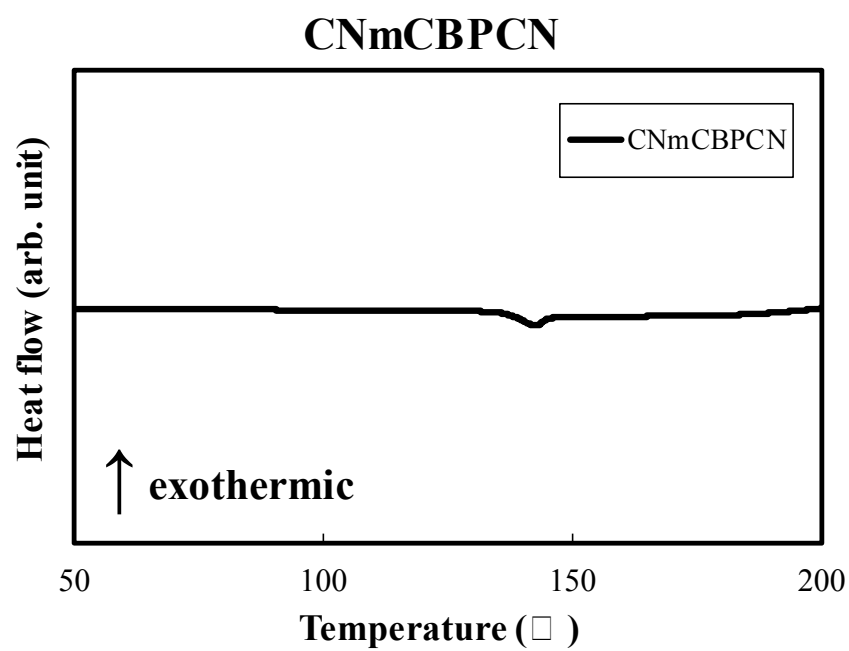

**Figure S2.** DSC thermograms of CNmCBPCN at a heating rate of 10 °C/min in nitrogen atmosphere.

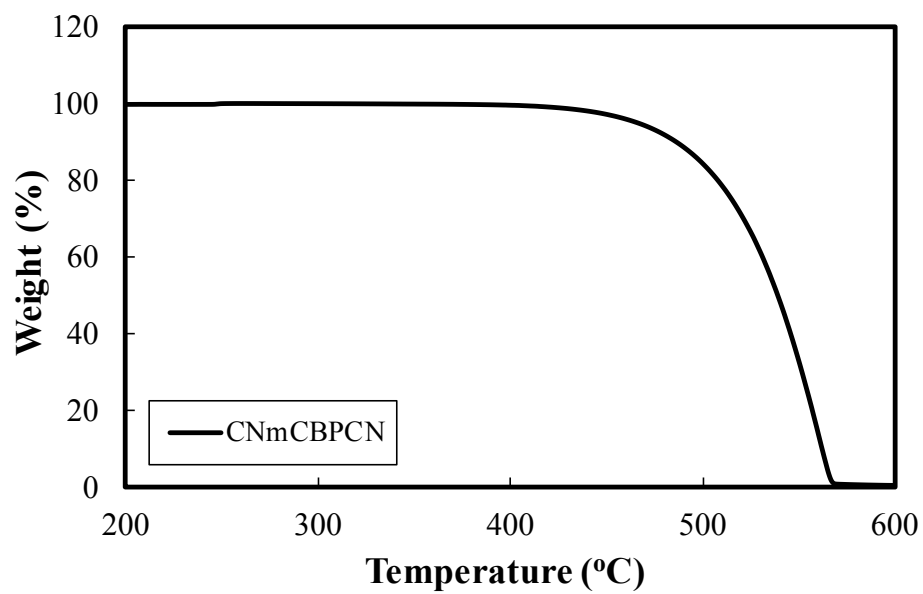

**Figure S3.** Thermogravimetric analysis data of CNmCBPCN at a heating rate of 10 °C/min in nitrogen atmosphere.

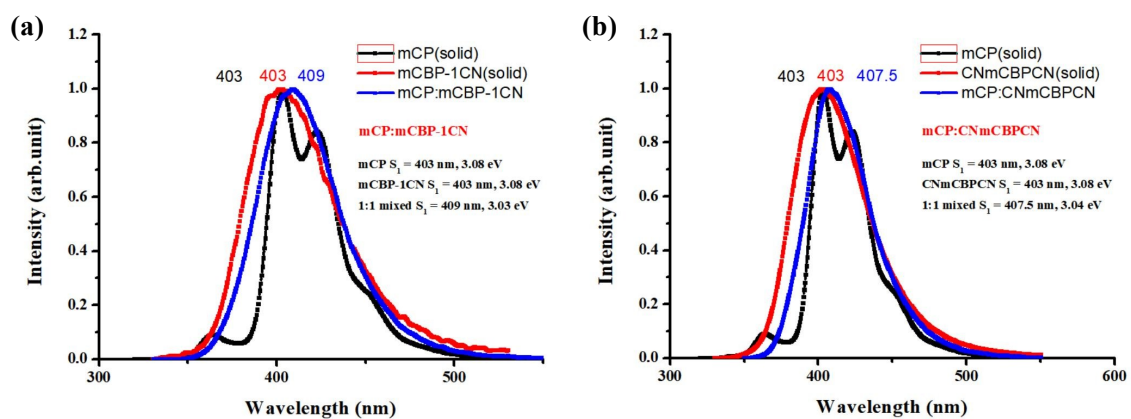

**Figure S4.** The PL emission spectra of each host and mixed hosts in (a) mCP:mCBP-1CN, (b) mCP:CNmCBPCN.

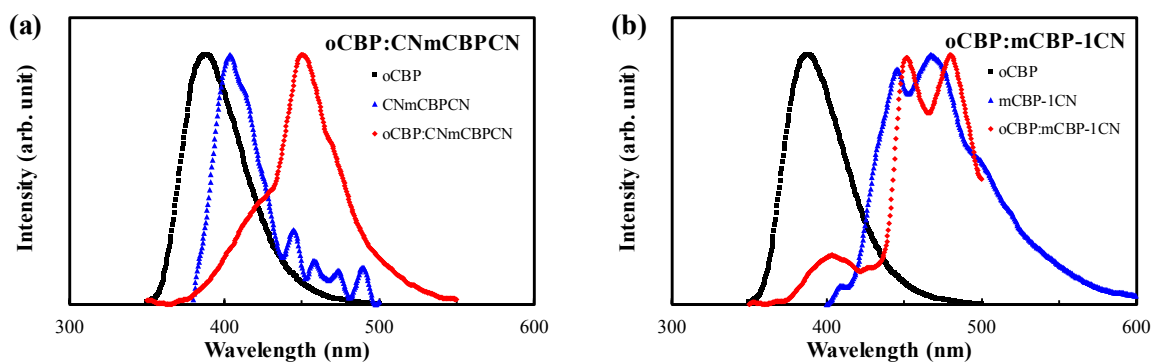

**Figure S5.** Each host was made into a solid film state, and the low temperature PL emission spectrum at 77K was observed to obtain the triplet energy value, (a) oCBP:CNmCBPCN, (b) oCBP:mCBP-1CN.

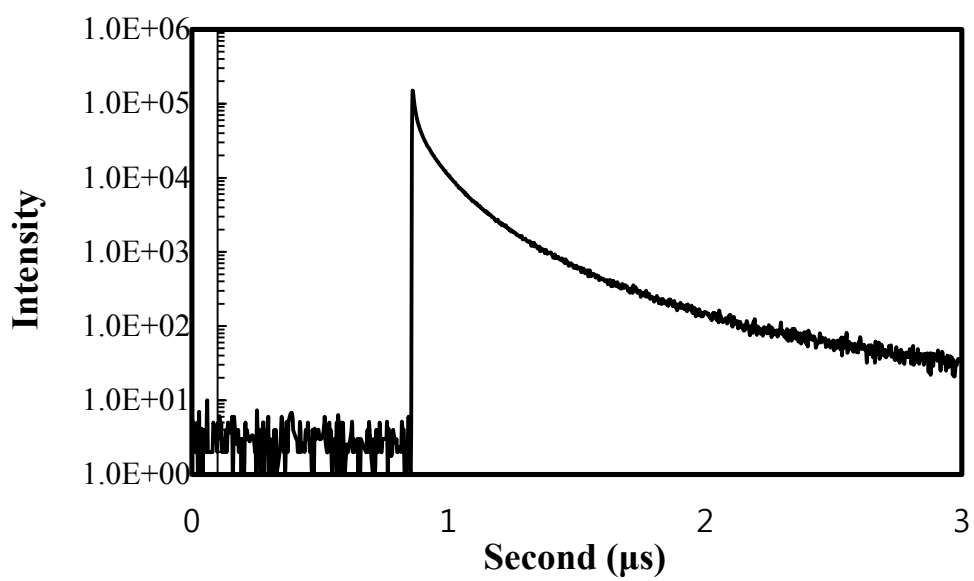

**Figure S6.** Transient PL decay curves of oCBP:CNmCBPCN film.

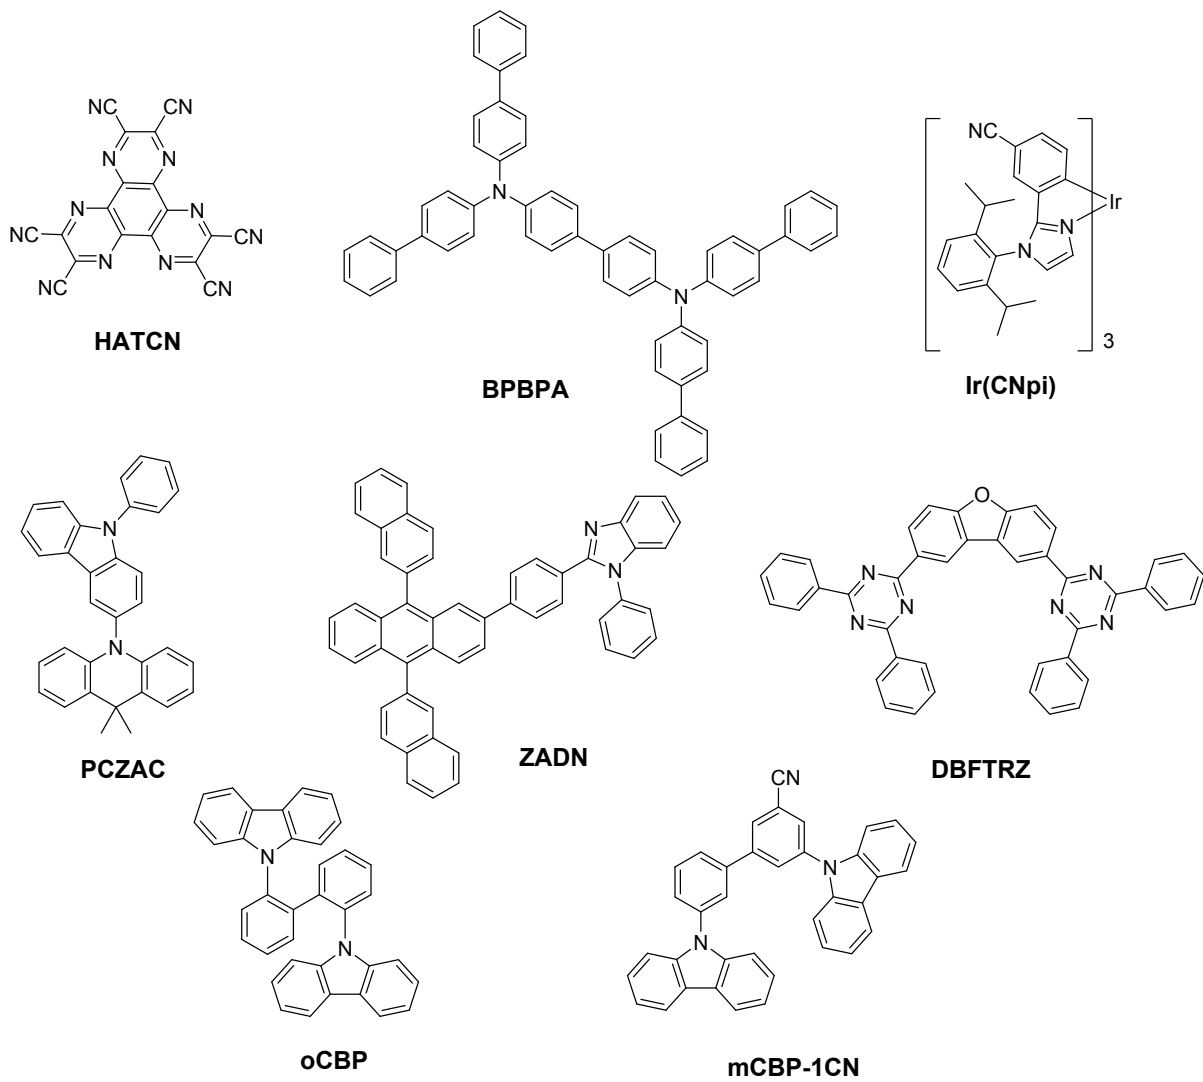

**Figure S7.** Chemical structures of materials in the blue OLED devices.



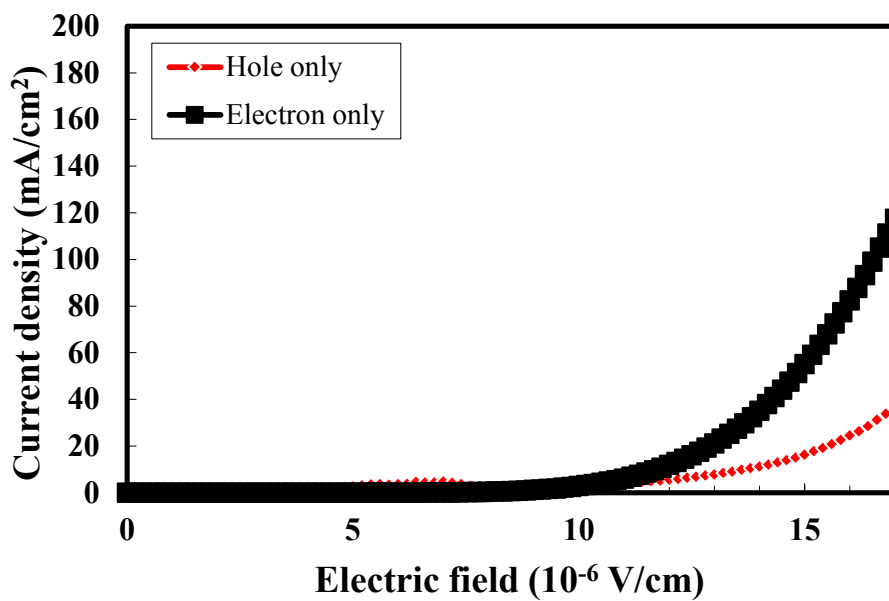

**Figure S8.** Current density-voltage curves of the hole only devices and electron only devices of CNmCBPCN.
